# Supplementary material
Source: PubMed Central journal article supplement (PMC6599178)
Supplement: 12250_2017_4021_MOESM1_ESM.pdf [file 12250_2017_4021_MOESM1_ESM.pdf]

## Electronic Supplementary Material

# Coexistence of multiple genotypes of porcine epidemic diarrhea virus with novel mutant S genes in the Hubei Province of China in 2016

Zhe Zeng<sup>1#</sup>, Ting-Ting Li<sup>2#</sup>, Xin Jin<sup>2</sup>, Fu-Hu Peng<sup>2</sup>, Nian-Hua Song<sup>2</sup>, Gui-Qing Peng<sup>1✉</sup>, Xing-Yi Ge<sup>3✉</sup>

1. State Key Laboratory of Agricultural Microbiology, College of Veterinary Medicine, Huazhong Agricultural University, Wuhan 430070, China
2. Hubei Animal Disease Prevention and Control Center, Wuhan 430070, China
3. College of Biology, Hunan University, Changsha 410082, China

Supporting information to DOI: 10.1007/s12250-017-4021-8

S1. PEDV-positive samples among those collected from 34 farms in 6 districts in the Hubei Province of China

| Location  | Farms    | Sample types | PEDV positives/total | Total positives |
|-----------|----------|--------------|----------------------|-----------------|
| Ezhou     | Farm 1   | Feces        | 3/6                  | 8/31(25.8%)     |
|           | Farm 2   | Feces        | 0/5                  |                 |
|           | Farm 3   | Feces        | 5/5                  |                 |
|           | Farm 4   | Feces        | 0/5                  |                 |
|           | Farm 5   | Feces        | 0/5                  |                 |
|           | Farm 6   | Feces        | 0/5                  |                 |
| Huanggang | Farm 7   | Feces        | 4/5                  | 28/29(96.6%)    |
|           | Farm 8   | Intestine    | 2/2                  |                 |
|           |          | Feces        | 10/10                |                 |
|           | Farm 9   | Intestine    | 2/2                  |                 |
| Feces     |          | 10/10        |                      |                 |
| Xiangyang | Farm 10  | Intestine    | 5/5                  | 14/40(35%)      |
|           | Farm 11  | Intestine    | 2/2                  |                 |
|           | Farm 12  | Intestine    | 2/2                  |                 |
|           | Farm 13  | Intestine    | 3/3                  |                 |
|           |          | Fecal Swab   | 0/10                 |                 |
|           |          | Intestine    | 0/1                  |                 |
|           | Farm 14  | Feces        | 0/3                  |                 |
|           |          | Intestine    | 0/2                  |                 |
|           |          | Feces        | 0/5                  |                 |
|           | Farm 15  | Intestine    | 1/1                  |                 |
|           |          | Fecal Swab   | 1/3                  |                 |
|           |          | Fecal Swab   | 0/3                  |                 |
|           | Jingzhou | Farm 18      | Feces                |                 |
| Farm 19   |          | Feces        | 3/3                  |                 |
| Farm 20   |          | Feces        | 0/4                  |                 |
| Farm 21   |          | Feces        | 4/4                  |                 |
| Farm 22   |          | Feces        | 2/4                  |                 |
| Farm 23   |          | Feces        | 2/2                  |                 |
| Farm 24   |          | Feces        | 2/4                  |                 |
| Farm 25   |          | Feces        | 3/3                  |                 |
| Farm 26   |          | Feces        | 1/3                  |                 |
| Yichang   |          | Farm 27      | Feces                | 0/5             |
|           | Farm 28  | Feces        | 0/5                  |                 |
|           | Farm 29  | Feces        | 0/6                  |                 |
|           | Farm 30  | Feces        | 0/6                  |                 |
|           | Farm 31  | Feces        | 1/7                  |                 |
| Jingmen   | Farm 32  | Feces        | 0/4                  | 4/14(28.6%)     |
|           | Farm 33  | Fecal Swab   | 0/5                  |                 |
|           | Farm 34  | Fecal Swab   | 4/5                  |                 |
| Total     |          |              |                      | 74/172(43%)     |

S2. New amino acid mutations in the spike proteins of field strains in Hubei in 2016

Virus Straines      Mutant amino acid sites in spike

Mutation  
aa  
numbers  
in S, S1,  
and S2

|                   | 27 | 59 | 70 | 102 | 104 | 112 | 114 | 117 | 118 | 124 | 129 | 133 | 177 | 190 | 227 | 231 | 270 | 289 | 300 | 305 | 306 | 325 | 336 | 358 | 364 | 386 | 413 | 431 | 479 | 505 | 526 | 567 | 597 | 622 | 636 | 638 | 641 | 655 | 672 | 674 | 686 | 756 | 812 | 830 | 865 | 928 | 982 | 1000 | 1021 | 1047 | 1060 | 1090 | 1110 | 1254 | 1377 | 1387 | S1 | S2 | Total |   |   |
|-------------------|----|----|----|-----|-----|-----|-----|-----|-----|-----|-----|-----|-----|-----|-----|-----|-----|-----|-----|-----|-----|-----|-----|-----|-----|-----|-----|-----|-----|-----|-----|-----|-----|-----|-----|-----|-----|-----|-----|-----|-----|-----|-----|-----|-----|-----|-----|------|------|------|------|------|------|------|------|------|----|----|-------|---|---|
| HBJM-1            | A  | Q  | Q  | P   | G   | A   | N   | T   | N   | H   | P   | T   | V   | D   | I   | P   | L   | L   | I   | S   | I   | D   | V   | I   | S   | H   | I   | G   | F   | H   | D   | T   | H   | S   | L   | F   | P   | E   | T   | T   | F   | A   | V   | I   | T   | A   | T   | V    | D    | L    | E    | Q    | H    | T    | I    | L    | Q  | V  | 4     | 1 | 5 |
| HBJM-2            | A  | Q  | Q  | P   | G   | A   | N   | T   | N   | R   | P   | T   | V   | D   | I   | P   | L   | L   | I   | S   | I   | D   | V   | I   | S   | H   | I   | G   | F   | H   | D   | T   | H   | S   | L   | F   | P   | E   | T   | T   | F   | A   | V   | I   | T   | A   | T   | V    | D    | L    | E    | Q    | H    | T    | I    | L    | Q  | V  | 3     | 1 | 4 |
| HBHG-1            | S  | Q  | Q  | P   | G   | A   | N   | T   | N   | R   | P   | V   | E   | I   | P   | L   | L   | M   | S   | I   | D   | V   | I   | S   | H   | I   | V   | L   | H   | A   | T   | H   | S   | L   | F   | S   | E   | T   | T   | F   | A   | V   | I   | T   | A   | T   | V   | D    | M    | E    | Q    | H    | T    | V    | L    | Q    | E  | 4  | 2     | 6 |   |
| HBJM-3            | S  | Q  | Q  | P   | G   | A   | N   | T   | N   | R   | P   | T   | V   | D   | I   | P   | L   | L   | I   | S   | M   | D   | V   | I   | S   | H   | I   | V   | F   | H   | V   | T   | H   | S   | L   | F   | P   | E   | T   | T   | F   | A   | V   | I   | T   | A   | T   | V    | D    | L    | E    | Q    | N    | V    | L    | Q    | V  | 2  | 2     | 4 |   |
| HBJZ-2            | S  | Q  | Q  | P   | G   | A   | N   | T   | N   | R   | P   | T   | V   | D   | I   | P   | L   | L   | I   | S   | M   | D   | V   | I   | S   | H   | I   | V   | F   | H   | A   | T   | H   | S   | L   | F   | P   | E   | T   | T   | F   | A   | V   | I   | T   | A   | T   | V    | D    | L    | E    | Q    | H    | T    | V    | L    | Q  | V  | 0     | 0 | 0 |
| HBXY-5            | S  | Q  | Q  | P   | G   | A   | N   | T   | N   | R   | P   | T   | V   | D   | I   | P   | L   | L   | I   | S   | M   | D   | V   | I   | S   | H   | I   | V   | F   | H   | A   | T   | H   | S   | L   | F   | P   | E   | T   | I   | S   | A   | V   | I   | T   | A   | T   | V    | D    | L    | E    | Q    | H    | T    | V    | L    | Q  | V  | 2     | 0 | 2 |
| HBHG-6            | S  | H  | Q  | P   | G   | A   | N   | T   | N   | R   | P   | T   | V   | D   | I   | P   | L   | L   | I   | S   | M   | D   | V   | I   | S   | H   | I   | V   | F   | H   | A   | T   | H   | S   | L   | L   | P   | E   | T   | T   | F   | A   | V   | I   | T   | A   | T   | V    | D    | L    | E    | Q    | H    | T    | V    | L    | Q  | V  | 2     | 0 | 2 |
| HBXY-4            | S  | Q  | Q  | P   | G   | A   | N   | T   | N   | R   | P   | T   | V   | D   | I   | P   | L   | L   | I   | S   | M   | D   | V   | I   | S   | H   | I   | V   | F   | A   | I   | H   | S   | L   | F   | P   | G   | T   | T   | F   | A   | V   | I   | K   | T   | T   | V   | D    | L    | E    | Q    | H    | T    | V    | L    | Q    | V  | 4  | 2     | 6 |   |
| HBJZ-1            | S  | Q  | Q  | P   | G   | A   | N   | T   | N   | R   | P   | T   | V   | D   | I   | P   | L   | L   | M   | S   | I   | D   | V   | I   | S   | H   | I   | V   | F   | H   | A   | T   | H   | S   | L   | F   | P   | E   | T   | T   | F   | A   | V   | I   | T   | A   | T   | V    | D    | L    | E    | Q    | H    | T    | V    | L    | Q  | V  | 0     | 0 | 0 |
| HBXY-1            | S  | Q  | Q  | P   | G   | A   | N   | T   | N   | R   | P   | T   | V   | D   | I   | P   | L   | L   | M   | S   | I   | D   | V   | I   | A   | H   | I   | V   | L   | H   | A   | T   | H   | Y   | L   | F   | P   | E   | T   | T   | F   | A   | V   | I   | T   | A   | T   | V    | D    | L    | E    | Q    | H    | T    | V    | L    | Q  | V  | 3     | 0 | 3 |
| HBXY-2            | S  | Q  | Q  | P   | G   | A   | N   | T   | N   | R   | P   | T   | V   | D   | I   | P   | L   | L   | M   | S   | I   | D   | V   | I   | A   | Y   | I   | V   | L   | H   | A   | T   | R   | S   | L   | F   | P   | E   | T   | T   | F   | A   | V   | I   | T   | A   | T   | V    | G    | L    | E    | Q    | H    | T    | V    | L    | Q  | V  | 4     | 0 | 4 |
| HBHG-2            | S  | Q  | Q  | P   | A   | N   | T   | N   | R   | H   | T   | V   | D   | I   | L   | L   | M   | S   | V   | D   | I   | I   | S   | H   | L   | V   | F   | H   | A   | T   | H   | S   | M   | F   | F   | E   | K   | T   | F   | S   | V   | I   | T   | A   | T   | V   | D   | M    | E    | Q    | H    | T    | V    | H    | Q    | V    | 9  | 2  | 11    |   |   |
| HBHG-3            | S  | Q  | Q  | P   | A   | N   | T   | N   | R   | H   | T   | V   | D   | I   | L   | L   | M   | S   | I   | D   | V   | I   | S   | H   | L   | V   | F   | H   | A   | T   | H   | S   | L   | F   | P   | E   | K   | T   | F   | S   | V   | I   | T   | A   | T   | V   | D   | M    | E    | Q    | H    | T    | V    | L    | Q    | V    | 6  | 1  | 7     |   |   |
| HBHG-4            | S  | Q  | Q  | P   | A   | N   | T   | N   | R   | H   | T   | V   | D   | I   | P   | L   | L   | M   | S   | I   | D   | V   | I   | S   | H   | L   | V   | F   | H   | A   | T   | H   | S   | L   | F   | P   | E   | K   | T   | F   | S   | V   | I   | T   | A   | T   | V   | D    | M    | E    | Q    | H    | T    | V    | L    | Q    | V  | 5  | 1     | 6 |   |
| HBHG-5            | S  | Q  | Q  | P   | A   | N   | T   | N   | R   | P   | T   | V   | D   | I   | P   | L   | L   | M   | S   | I   | D   | V   | I   | S   | H   | L   | V   | F   | H   | A   | T   | H   | S   | L   | F   | P   | E   | K   | T   | F   | S   | V   | I   | T   | A   | T   | V   | D    | M    | E    | Q    | H    | T    | V    | L    | Q    | V  | 3  | 1     | 4 |   |
| HBXY-3            | S  | Q  | Q  | S   | G   | A   | N   | T   | N   | R   | P   | T   | V   | D   | I   | P   | V   | L   | V   | S   | M   | D   | V   | I   | S   | H   | I   | V   | F   | H   | A   | T   | H   | S   | L   | F   | P   | E   | T   | T   | F   | P   | I   | I   | T   | A   | T   | V    | D    | L    | Q    | H    | T    | V    | L    | Q    | V  | 4  | 1     | 5 |   |
| HBEZ-1            | S  | Q  | Q  | P   | G   | A   | N   | T   | N   | R   | P   | T   | L   | D   | I   | L   | L   | I   | S   | I   | D   | V   | V   | S   | R   | I   | V   | F   | H   | A   | T   | H   | S   | L   | F   | P   | E   | T   | T   | F   | A   | V   | T   | A   | N   | I   | D   | L    | E    | Q    | H    | T    | V    | L    | Q    | V    | 5  | 2  | 7     |   |   |
| HBYC-1            | Q  | -  | S  | P   | G   | P   | D   | A   | G   | R   | P   | T   | V   | D   | I   | P   | L   | L   | I   | S   | M   | D   | V   | I   | S   | H   | I   | V   | F   | H   | A   | T   | Y   | S   | L   | F   | P   | E   | T   | T   | F   | A   | V   | I   | T   | S   | T   | V    | D    | L    | E    | Q    | H    | T    | V    | L    | Q  | V  | 6     | 0 | 6 |
| HBEZ-4            | Q  | -  | G  | P   | G   | A   | N   | H   | N   | R   | P   | T   | V   | D   | I   | P   | L   | L   | I   | L   | M   | Y   | V   | I   | S   | H   | I   | V   | F   | H   | A   | T   | R   | S   | L   | F   | P   | E   | T   | T   | F   | A   | V   | I   | T   | A   | T   | V    | D    | L    | E    | H    | H    | T    | V    | L    | H  | V  | 2     | 2 | 4 |
| HBEZ-3            | Q  | -  | G  | P   | G   | A   | N   | H   | N   | R   | P   | T   | V   | D   | I   | P   | L   | L   | I   | L   | M   | Y   | V   | I   | S   | H   | I   | V   | F   | H   | A   | T   | H   | S   | L   | F   | P   | E   | T   | T   | F   | A   | V   | I   | T   | A   | T   | V    | D    | L    | E    | H    | H    | T    | V    | L    | Q  | V  | 2     | 1 | 3 |
| HBEZ-2            | Q  | -  | G  | P   | G   | A   | N   | H   | N   | R   | P   | T   | V   | D   | I   | P   | L   | L   | I   | S   | M   | Y   | V   | I   | S   | H   | I   | V   | F   | H   | A   | T   | H   | S   | L   | F   | P   | E   | T   | T   | F   | A   | V   | I   | T   | A   | T   | V    | D    | L    | E    | H    | H    | T    | V    | L    | Q  | V  | 1     | 1 | 2 |
| YC2014            | S  | Q  | Q  | P   | G   | A   | N   | T   | N   | R   | P   | T   | V   | D   | I   | P   | L   | L   | M   | S   | I   | D   | V   | I   | S   | H   | I   | V   | F   | H   | A   | T   | H   | S   | L   | F   | P   | E   | T   | T   | F   | A   | V   | I   | T   | A   | T   | V    | D    | L    | E    | Q    | H    | T    | V    | L    | Q  | V  |       |   |   |
| CH-QTC-01-2015    | S  | Q  | Q  | P   | G   | A   | N   | T   | N   | R   | P   | T   | V   | D   | I   | P   | L   | L   | M   | S   | I   | D   | V   | I   | S   | H   | I   | V   | F   | H   | A   | T   | H   | S   | L   | F   | P   | E   | T   | T   | F   | A   | V   | I   | T   | A   | T   | V    | D    | L    | E    | Q    | H    | T    | V    | L    | Q  | V  |       |   |   |
| HB-HA2015         | S  | Q  | Q  | P   | G   | A   | N   | T   | N   | R   | P   | T   | F   | D   | I   | P   | L   | L   | I   | S   | I   | D   | V   | I   | S   | H   | I   | V   | F   | H   | A   | T   | H   | S   | L   | F   | P   | E   | T   | T   | F   | A   | V   | I   | T   | A   | T   | V    | D    | L    | E    | Q    | H    | T    | V    | L    | Q  | V  |       |   |   |
| US/Coloreado/2013 | S  | Q  | Q  | P   | G   | A   | N   | T   | N   | R   | P   | T   | V   | D   | I   | P   | L   | L   | I   | S   | I   | D   | V   | I   | S   | H   | I   | V   | F   | H   | A   | T   | H   | S   | L   | F   | P   | E   | T   | T   | F   | A   | V   | I   | T   | A   | T   | V    | D    | L    | E    | Q    | H    | T    | V    | L    | Q  | V  |       |   |   |

Continued

Mutant amino acid sites in spike

Mutation  
aa  
numbers  
in S, S1,  
and S2

| Virus Straines  | 27       | 59       | 70       | 102      | 104      | 112      | 114      | 117      | 118      | 124      | 129      | 133      | 177      | 190      | 227      | 231      | 270      | 287      | 289      | 300      | 305      | 306      | 308      | 325      | 336      | 358      | 364      | 386      | 413      | 431      | 479      | 505      | 526      | 567      | 597      | 622      | 636      | 638      | 641      | 655      | 672      | 674      | 696      | 756      | 812      | 830      | 865      | 928      | 992      | 1000     | 1021     | 1047     | 1060     | 1090     | 1110     | 1254     | 1377     | 1387     | S1       | S2 | Total |
|-----------------|----------|----------|----------|----------|----------|----------|----------|----------|----------|----------|----------|----------|----------|----------|----------|----------|----------|----------|----------|----------|----------|----------|----------|----------|----------|----------|----------|----------|----------|----------|----------|----------|----------|----------|----------|----------|----------|----------|----------|----------|----------|----------|----------|----------|----------|----------|----------|----------|----------|----------|----------|----------|----------|----------|----------|----------|----------|----------|----------|----|-------|
| IA2             | S        | Q        | Q        | P        | G        | A        | N        | T        | N        | R        | P        | T        | V        | D        | I        | P        | L        | L        | I        | S        | I        | D        | V        | I        | S        | H        | I        | V        | F        | H        | A        | T        | H        | S        | L        | F        | P        | E        | T        | T        | F        | A        | V        | I        | T        | A        | T        | V        | D        | L        | E        | Q        | H        | T        | V        | L        | Q        | V        |          |    |       |
| GD17            | S        | Q        | Q        | P        | G        | A        | N        | T        | N        | R        | P        | T        | V        | D        | I        | P        | L        | L        | I        | S        | M        | D        | V        | I        | S        | L        | I        | V        | F        | H        | A        | T        | H        | S        | L        | F        | P        | E        | T        | T        | F        | A        | V        | I        | T        | A        | T        | V        | D        | L        | E        | Q        | H        | T        | V        | L        | Q        | V        |          |    |       |
| CHGD-01         | S        | Q        | Q        | P        | G        | A        | N        | T        | N        | R        | P        | T        | V        | D        | I        | P        | L        | L        | I        | S        | I        | D        | V        | I        | S        | H        | I        | V        | F        | H        | A        | T        | H        | S        | L        | F        | P        | E        | T        | T        | F        | A        | V        | I        | T        | A        | T        | V        | D        | L        | E        | Q        | H        | T        | V        | L        | Q        | V        |          |    |       |
| CH-SDLQ-2015    | S        | Q        | Q        | P        | G        | A        | N        | T        | N        | R        | P        | T        | V        | D        | I        | P        | L        | L        | I        | S        | M        | D        | V        | I        | S        | H        | V        | F        | H        | A        | T        | H        | S        | L        | F        | P        | E        | T        | T        | F        | A        | V        | I        | T        | A        | T        | V        | D        | L        | E        | Q        | H        | T        | V        | L        | Q        | V        |          |          |    |       |
| CH-CCC-2013     | S        | Q        | Q        | P        | G        | A        | N        | T        | N        | R        | P        | T        | V        | D        | I        | P        | L        | L        | M        | S        | I        | D        | V        | I        | S        | H        | I        | V        | F        | H        | A        | T        | H        | S        | L        | F        | P        | E        | T        | T        | F        | A        | V        | I        | T        | A        | T        | V        | D        | L        | E        | Q        | H        | T        | V        | L        | Q        | V        |          |    |       |
| CH-HGC          | S        | Q        | Q        | P        | G        | A        | N        | T        | N        | R        | P        | T        | V        | D        | I        | P        | L        | L        | M        | S        | I        | D        | V        | I        | S        | H        | I        | V        | F        | H        | A        | T        | H        | S        | L        | F        | P        | E        | T        | T        | F        | A        | V        | I        | T        | A        | T        | V        | D        | L        | E        | Q        | H        | T        | V        | L        | Q        | V        |          |    |       |
| CH-XBC-01-2015  | Q        | -        | G        | P        | G        | A        | N        | H        | N        | R        | P        | T        | V        | D        | I        | P        | L        | L        | I        | S        | M        | D        | V        | I        | S        | H        | I        | V        | F        | H        | A        | T        | H        | S        | L        | F        | P        | E        | T        | T        | F        | A        | V        | I        | T        | A        | T        | V        | D        | L        | E        | Q        | H        | T        | V        | L        | Q        | V        |          |    |       |
| OH851           | Q        | -        | G        | P        | G        | A        | N        | H        | N        | R        | P        | T        | V        | D        | I        | P        | L        | L        | I        | S        | M        | D        | V        | I        | S        | H        | I        | V        | F        | H        | A        | T        | H        | S        | L        | F        | P        | E        | T        | T        | F        | A        | V        | I        | T        | A        | T        | V        | D        | L        | E        | Q        | H        | T        | V        | L        | Q        | V        |          |    |       |
| HUA-PED58       | Q        | -        | G        | P        | G        | A        | N        | T        | N        | R        | P        | T        | V        | D        | I        | P        | L        | L        | I        | S        | M        | D        | V        | I        | S        | H        | I        | V        | F        | H        | A        | T        | H        | S        | L        | F        | P        | E        | T        | T        | F        | A        | V        | I        | T        | A        | T        | V        | D        | L        | E        | Q        | H        | T        | V        | L        | Q        | V        |          |    |       |
| ZL29            | Q        | -        | G        | P        | G        | A        | N        | H        | N        | R        | P        | T        | V        | D        | I        | P        | L        | L        | I        | S        | I        | D        | V        | I        | S        | H        | I        | V        | F        | H        | A        | T        | H        | S        | L        | F        | P        | E        | T        | T        | F        | A        | V        | I        | T        | A        | T        | V        | D        | L        | E        | Q        | H        | T        | V        | L        | Q        | V        |          |    |       |
| Virulent CV777  | Q        | -        | G        | P        | G        | A        | N        | T        | N        | R        | P        | T        | V        | D        | I        | P        | L        | L        | I        | S        | M        | D        | V        | I        | S        | H        | I        | V        | F        | H        | A        | T        | H        | S        | L        | F        | P        | E        | T        | T        | I        | A        | V        | I        | T        | A        | T        | V        | D        | L        | E        | Q        | H        | T        | V        | L        | Q        | V        |          |    |       |
| AttenuatedDR13  | Q        | -        | G        | P        | G        | A        | N        | T        | S        | R        | P        | T        | V        | D        | I        | P        | L        | W        | I        | S        | M        | D        | V        | I        | S        | H        | I        | V        | F        | H        | A        | T        | H        | S        | L        | F        | P        | Q        | T        | T        | F        | A        | V        | I        | T        | A        | T        | V        | D        | L        | E        | Q        | H        | T        | V        | L        | Q        | V        |          |    |       |
| AttenuatedCV777 | Q        | -        | G        | P        | G        | A        | N        | T        | S        | R        | P        | T        | V        | D        | I        | P        | L        | W        | I        | S        | M        | D        | V        | I        | S        | H        | I        | V        | F        | H        | S        | T        | H        | S        | L        | F        | P        | Q        | T        | T        | F        | A        | V        | I        | T        | A        | T        | V        | D        | L        | E        | Q        | H        | T        | V        | L        | Q        | V        |          |    |       |
| Consensus       | <b>S</b> | <b>Q</b> | <b>Q</b> | <b>P</b> | <b>G</b> | <b>A</b> | <b>N</b> | <b>T</b> | <b>N</b> | <b>R</b> | <b>P</b> | <b>T</b> | <b>V</b> | <b>D</b> | <b>I</b> | <b>P</b> | <b>L</b> | <b>L</b> | <b>I</b> | <b>S</b> | <b>I</b> | <b>M</b> | <b>D</b> | <b>V</b> | <b>I</b> | <b>S</b> | <b>H</b> | <b>I</b> | <b>V</b> | <b>F</b> | <b>H</b> | <b>A</b> | <b>T</b> | <b>H</b> | <b>S</b> | <b>L</b> | <b>F</b> | <b>P</b> | <b>E</b> | <b>T</b> | <b>T</b> | <b>F</b> | <b>A</b> | <b>V</b> | <b>I</b> | <b>T</b> | <b>A</b> | <b>T</b> | <b>V</b> | <b>D</b> | <b>L</b> | <b>E</b> | <b>Q</b> | <b>H</b> | <b>T</b> | <b>V</b> | <b>L</b> | <b>Q</b> | <b>V</b> |    |       |

Note: Viral strains and new amino acids changes found in spikes of field strains in Hubei 2016 and consensus amino acids were in red.

S3. Nt and aa pairwise identities of S genes and the encoded spike proteins

S4. A fasta format file of the nt pairwise alignment of S genes

S5. A fasta format file of the aa pairwise alignment of spike proteins

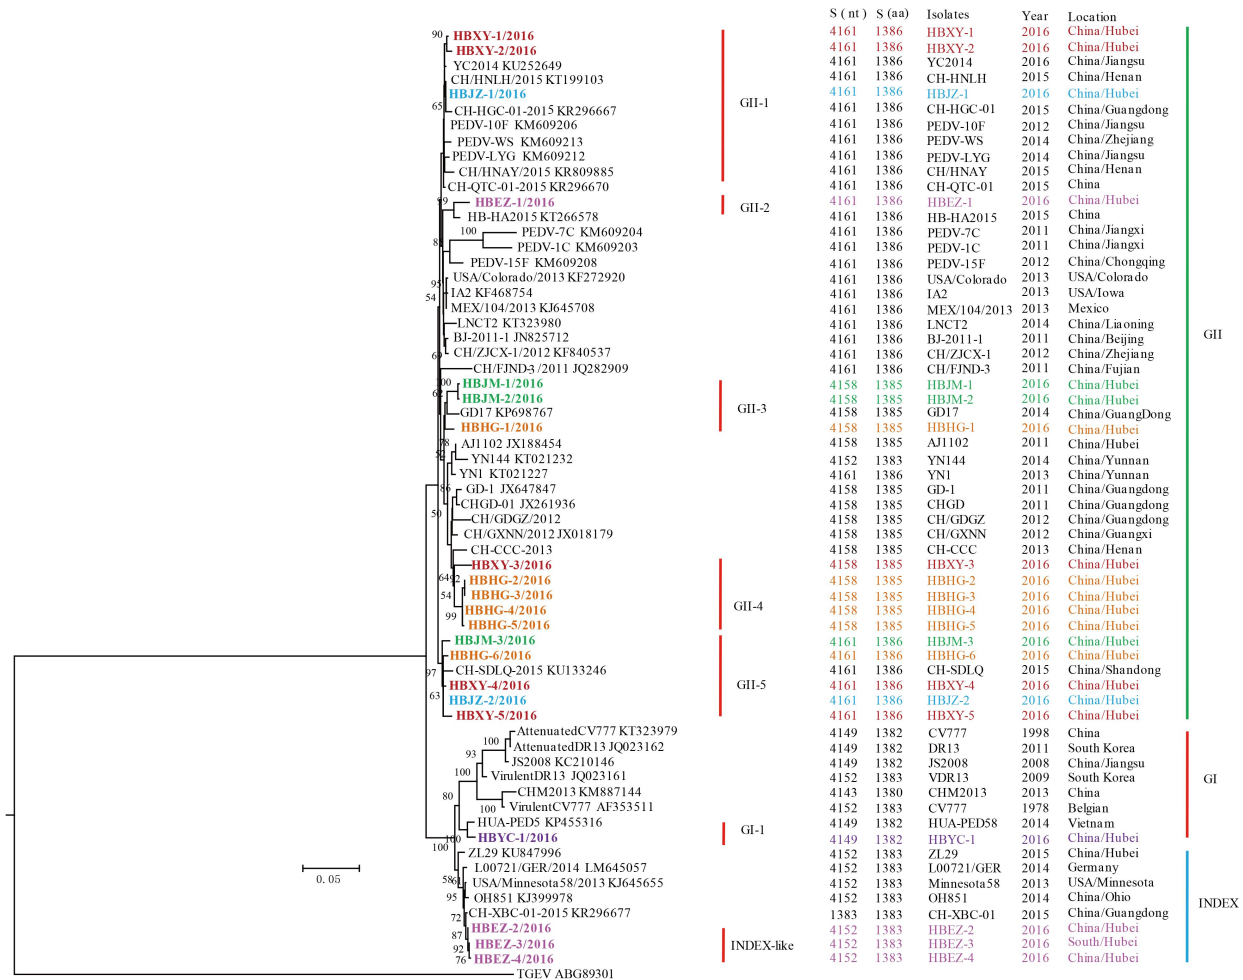

S6. Phylogenetic analysis of full-length amino acid sequences of spike proteins of PEDV and transmissible gastroenteritis virus (TGEV). The phylogenetic tree was constructed based on the maximum likelihood method using a Poisson model under 1000 replicates of bootstrap values; for each node, bootstraps  $\geq 50\%$  are shown. The scale bar represents 0.005 substitutions per amino acid. The strain names, isolation years and places, and GenBank accession numbers are shown. S (nt) and S (aa) indicate the complete length of the nucleotide and amino acid sequences of the S genes and S proteins, respectively. The results for the GI, GII, and INDEX-like genogroups were inconsistent with those of previous studies; subgroups shown in the figure were proposed in this study for better description of the genetic diversity of spike proteins. Spike sequences detected in this study are colored and in bold. The TGEV was used as an out-group.
